# Supplementary material
Source: publisher site journal article supplement (https://www.spandidos-publications.com/2397/downloadSupplementary)

Figure S1. Images of xenograft tumors collected from mice in the LNCaP and siRNA-LSD1 groups. siRNA, small interfering RNA; LSD1, lysine-specific demethylase 1.

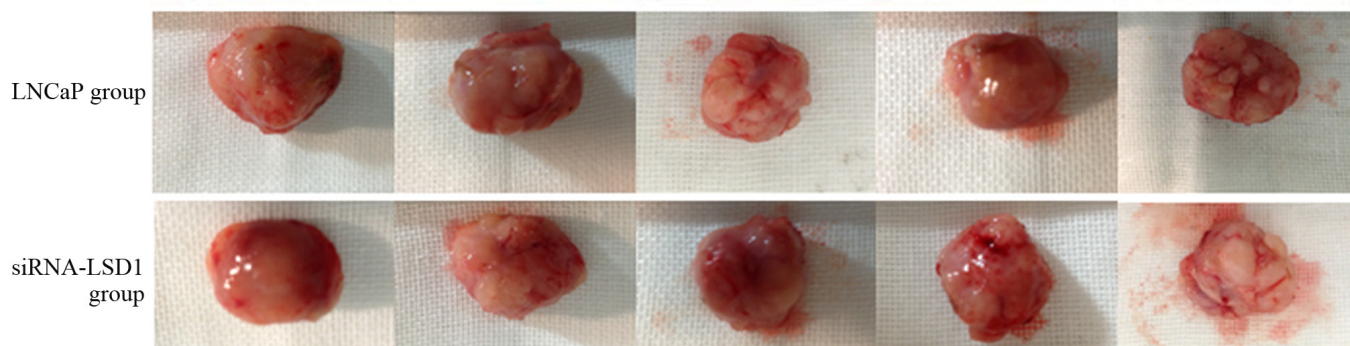

Supplement: Supplementary file 1 [file downloadSupplementary]
